# Supplementary material
Source: publisher site journal article supplement (https://www.spandidos-publications.com/7282/downloadSupplementary)
Supplement: Supplementary file 1 [file downloadSupplementary]

## Sheet: Diff_distribution
Table SIII. Different modification sites and proteins.
Type	Upregulated	Downregulated
Site	3	10
Protein	3	10

## Sheet: Supplementary Table3
Protein accession	Position	Amino acid	SLC4A7/Vector Ratio	SLC4A7/Vector P value	Regulated Type	Protein description	Gene name	Localization probability	PEP	Score	Charge	Modified sequence	Mass error [ppm]	Relative intensity Vector_1	Relative intensity Vector_2	Relative intensity Vector_3	Relative intensity SLC4A7_1	Relative intensity SLC4A7_2	Relative intensity SLC4A7_3	Subcellular localization	KEGG KO No.	KEGG Gene	KEGG pathway	Biological Process	Cellular Component	Molecular Function	Pfam ID	Domain description	KOG category	KOG NO.	KOG description
P07900	632	K	0.571	0.0497585	Down	Heat shock protein HSP 90-alpha OS=Homo sapiens OX=9606 GN=HSP90AA1 PE=1 SV=5	HSP90AA1	1	1.05873e-09	127.07	3	K(1)HLEINPDHSIIETLR	0.34557	1.582	1.392	0.864	0.663	0.784	0.746	cytoplasm	K04079	HSP90A; molecular chaperone HtpG	hsa05215 Prostate cancer; hsa04612 Antigen processing and presentation; hsa05200 Pathways in cancer; hsa05207 Chemical carcinogenesis - receptor activation; hsa04659 Th17 cell differentiation; hsa05418 Fluid shear stress and atherosclerosis; hsa05132 Salmonella infection; hsa04621 NOD-like receptor signaling pathway; hsa04657 IL-17 signaling pathway; hsa04151 PI3K-Akt signaling pathway; hsa04914 …	GO:0000086 G2/M transition of mitotic cell cycle; GO:0000278 mitotic cell cycle; GO:0000723 telomere maintenance; GO:0000902 cell morphogenesis; GO:0000904 cell morphogenesis involved in differentiation; GO:0001505 regulation of neurotransmitter levels; GO:0001764 neuron migration; GO:0001775 cell activation; GO:0001932 regulation of protein phosphorylation; GO:0001934 positive regulation of prot…	GO:0000323 lytic vacuole; GO:0001726 ruffle; GO:0005576 extracellular region; GO:0005622 intracellular; GO:0005623 cell; GO:0005634 nucleus; GO:0005654 nucleoplasm; GO:0005737 cytoplasm; GO:0005764 lysosome; GO:0005765 lysosomal membrane; GO:0005773 vacuole; GO:0005774 vacuolar membrane; GO:0005775 vacuolar lumen; GO:0005829 cytosol; GO:0005886 plasma membrane; GO:0005903 brush border; GO:0005929…	GO:0000166 nucleotide binding; GO:0001882 nucleoside binding; GO:0001883 purine nucleoside binding; GO:0001884 pyrimidine nucleoside binding; GO:0002134 UTP binding; GO:0002135 CTP binding; GO:0003676 nucleic acid binding; GO:0003723 RNA binding; GO:0003729 mRNA binding; GO:0003824 catalytic activity; GO:0004672 protein kinase activity; GO:0004713 protein tyrosine kinase activity; GO:0005102 sign…	PF02518	Histidine kinase-, DNA gyrase B-, and HSP90-like ATPase	O	KOG0019	Molecular chaperone (HSP90 family)
P21333	626	K	0.218	0.00963616	Down	Filamin-A OS=Homo sapiens OX=9606 GN=FLNA PE=1 SV=4	FLNA	1	1.69119e-16	144.51	2	IECDDK(1)GDGSCDVR	0.057572	1.291	1.868	1.149	0.241		0.386	cytoplasm	K04437	FLNA; filamin	hsa04510 Focal adhesion; hsa05132 Salmonella infection; hsa05205 Proteoglycans in cancer; hsa04010 MAPK signaling pathway	GO:0000003 reproduction; GO:0000226 microtubule cytoskeleton organization; GO:0000278 mitotic cell cycle; GO:0000280 nuclear division; GO:0000902 cell morphogenesis; GO:0000904 cell morphogenesis involved in differentiation; GO:0001525 angiogenesis; GO:0001568 blood vessel development; GO:0001775 cell activation; GO:0001837 epithelial to mesenchymal transition; GO:0001944 vasculature development;…	GO:0005576 extracellular region; GO:0005622 intracellular; GO:0005623 cell; GO:0005634 nucleus; GO:0005694 chromosome; GO:0005730 nucleolus; GO:0005737 cytoplasm; GO:0005794 Golgi apparatus; GO:0005802 trans-Golgi network; GO:0005829 cytosol; GO:0005856 cytoskeleton; GO:0005884 actin filament; GO:0005886 plasma membrane; GO:0005903 brush border; GO:0005911 cell-cell junction; GO:0005938 cell cort…	GO:0001664 G protein-coupled receptor binding; GO:0003779 actin binding; GO:0005080 protein kinase C binding; GO:0005102 signaling receptor binding; GO:0005488 binding; GO:0005515 protein binding; GO:0008092 cytoskeletal protein binding; GO:0008134 transcription factor binding; GO:0015459 potassium channel regulator activity; GO:0016247 channel regulator activity; GO:0017016 Ras GTPase binding; G…	PF00307; PF00630	Calponin homology (CH) domain; Filamin/ABP280 repeat	Z	KOG0518	Actin-binding cytoskeleton protein, filamin
P26640	1230	K	2.744	0.0338525	Up	Valine--tRNA ligase OS=Homo sapiens OX=9606 GN=VARS1 PE=1 SV=4	VARS1	1	6.17815e-13	96.453	2	AASGYPVK(1)VPLEVQEADEAK	-0.050483	0.464	0.393	0.707	2.096	0.87	1.326	cytoplasm	K01873	VARS; valyl-tRNA synthetase [EC:6.1.1.9]	hsa00970 Aminoacyl-tRNA biosynthesis	GO:0006082 organic acid metabolic process; GO:0006139 nucleobase-containing compound metabolic process; GO:0006399 tRNA metabolic process; GO:0006412 translation; GO:0006418 tRNA aminoacylation for protein translation; GO:0006438 valyl-tRNA aminoacylation; GO:0006518 peptide metabolic process; GO:0006520 cellular amino acid metabolic process; GO:0006725 cellular aromatic compound metabolic proces…	GO:0005622 intracellular; GO:0005623 cell; GO:0005737 cytoplasm; GO:0005829 cytosol;	GO:0003824 catalytic activity; GO:0004812 aminoacyl-tRNA ligase activity; GO:0004832 valine-tRNA ligase activity; GO:0016874 ligase activity; GO:0016875 ligase activity, forming carbon-oxygen bonds; GO:0140098 catalytic activity, acting on RNA; GO:0140101 catalytic activity, acting on a tRNA;	PF00043; PF08264	Glutathione S-transferase, C-terminal domain; Anticodon-binding domain of tRNA	J	KOG0867	Glutathione S-transferase
P35579	1274	K	0.647	0.03156	Down	Myosin-9 OS=Homo sapiens OX=9606 GN=MYH9 PE=1 SV=4	MYH9	1	0.00145182	78.816	2	TELADK(1)VTK	0.18259	1.339	1.196		0.693	0.853	0.914	cytoplasm,nucleus	K10352	MYH9s; myosin heavy chain 9/10/11/14	hsa04810 Regulation of actin cytoskeleton; hsa04270 Vascular smooth muscle contraction; hsa05130 Pathogenic Escherichia coli infection; hsa04530 Tight junction	GO:0000003 reproduction; GO:0000212 meiotic spindle organization; GO:0000226 microtubule cytoskeleton organization; GO:0000768 syncytium formation by plasma membrane fusion; GO:0000902 cell morphogenesis; GO:0000904 cell morphogenesis involved in differentiation; GO:0000910 cytokinesis; GO:0001525 angiogenesis; GO:0001541 ovarian follicle development; GO:0001568 blood vessel development; GO:00016…	GO:0001725 stress fiber; GO:0001726 ruffle; GO:0001931 uropod; GO:0005622 intracellular; GO:0005623 cell; GO:0005634 nucleus; GO:0005737 cytoplasm; GO:0005739 mitochondrion; GO:0005826 actomyosin contractile ring; GO:0005829 cytosol; GO:0005856 cytoskeleton; GO:0005884 actin filament; GO:0005886 plasma membrane; GO:0005903 brush border; GO:0005911 cell-cell junction; GO:0005912 adherens junction;…	GO:0000146 microfilament motor activity; GO:0000166 nucleotide binding; GO:0001664 G protein-coupled receptor binding; GO:0001965 G-protein alpha-subunit binding; GO:0003774 motor activity; GO:0003779 actin binding; GO:0003824 catalytic activity; GO:0005102 signaling receptor binding; GO:0005215 transporter activity; GO:0005391 sodium:potassium-exchanging ATPase activity; GO:0005488 binding; GO:0…	PF02736; PF00063	Myosin N-terminal SH3-like domain; Myosin head (motor domain)	Z	KOG0161	Myosin class II heavy chain
P46013	1275	K	0.662	0.0322607	Down	Proliferation marker protein Ki-67 OS=Homo sapiens OX=9606 GN=MKI67 PE=1 SV=2	MKI67	1	6.48852e-05	97.175	2	K(1)ADVEGELLACR	-0.10033		0.966	0.859		0.633	0.575	mitochondria	K17582			GO:0000003 reproduction; GO:0001889 liver development; GO:0007049 cell cycle; GO:0007088 regulation of mitotic nuclear division; GO:0007275 multicellular organism development; GO:0007346 regulation of mitotic cell cycle; GO:0008283 cell population proliferation; GO:0009653 anatomical structure morphogenesis; GO:0009887 animal organ morphogenesis; GO:0009987 cellular process; GO:0010564 regulation…	GO:0000775 chromosome, centromeric region; GO:0000793 condensed chromosome; GO:0005622 intracellular; GO:0005623 cell; GO:0005634 nucleus; GO:0005654 nucleoplasm; GO:0005694 chromosome; GO:0005730 nucleolus; GO:0005737 cytoplasm; GO:0016604 nuclear body; GO:0031974 membrane-enclosed lumen; GO:0031981 nuclear lumen; GO:0043226 organelle; GO:0043227 membrane-bounded organelle; GO:0043228 non-membra…	GO:0005488 binding; GO:0005515 protein binding; GO:0008022 protein C-terminus binding;
P51948	176	K	0.649	0.0187545	Down	CDK-activating kinase assembly factor MAT1 OS=Homo sapiens OX=9606 GN=MNAT1 PE=1 SV=1	MNAT1	1	0.000152319	134.66	2	EEQLQQILK(1)R	0.58768		1.245	1.105		0.759	0.766	nucleus	K10842	MNAT1; CDK-activating kinase assembly factor MAT1	hsa03022 Basal transcription factors; hsa03420 Nucleotide excision repair	GO:0000079 regulation of cyclin-dependent protein serine/threonine kinase activity; GO:0001932 regulation of protein phosphorylation; GO:0006139 nucleobase-containing compound metabolic process; GO:0006259 DNA metabolic process; GO:0006281 DNA repair; GO:0006283 transcription-coupled nucleotide-excision repair; GO:0006289 nucleotide-excision repair; GO:0006294 nucleotide-excision repair, preincis…	GO:0000428 DNA-directed RNA polymerase complex; GO:0005622 intracellular; GO:0005623 cell; GO:0005634 nucleus; GO:0005654 nucleoplasm; GO:0005667 transcription regulator complex; GO:0005675 transcription factor TFIIH holo complex; GO:0005737 cytoplasm; GO:0005829 cytosol; GO:0016591 RNA polymerase II, holoenzyme; GO:0030880 RNA polymerase complex; GO:0031974 membrane-enclosed lumen; GO:0031981 nu…	GO:0005488 binding; GO:0005515 protein binding; GO:0008270 zinc ion binding; GO:0043167 ion binding; GO:0043169 cation binding; GO:0046872 metal ion binding; GO:0046914 transition metal ion binding; GO:0047485 protein N-terminus binding;			O	KOG3800	Predicted E3 ubiquitin ligase containing RING finger, subunit of transcription/repair factor TFIIH and CDK-activating kinase assembly factor
P60709	315	K	0.63	0.0135434	Down	Actin, cytoplasmic 1 OS=Homo sapiens OX=9606 GN=ACTB PE=1 SV=1	ACTB	1	6.76455e-08	126.21	2	MQK(1)EITALAPSTMK	-1.6349	1.476	1.099	1.106	0.773	0.71	0.835	cytoskeleton	K05692	ACTB_G1; actin beta/gamma 1	hsa04510 Focal adhesion; hsa04921 Oxytocin signaling pathway; hsa05412 Arrhythmogenic right ventricular cardiomyopathy; hsa04919 Thyroid hormone signaling pathway; hsa05110 Vibrio cholerae infection; hsa05418 Fluid shear stress and atherosclerosis; hsa05131 Shigellosis; hsa05132 Salmonella infection; hsa05416 Viral myocarditis; hsa05225 Hepatocellular carcinoma; hsa04670 Leukocyte transendothelia…	GO:0000079 regulation of cyclin-dependent protein serine/threonine kinase activity; GO:0000902 cell morphogenesis; GO:0000904 cell morphogenesis involved in differentiation; GO:0001654 eye development; GO:0001932 regulation of protein phosphorylation; GO:0001933 negative regulation of protein phosphorylation; GO:0002252 immune effector process; GO:0002253 activation of immune response; GO:0002376…	GO:0000123 histone acetyltransferase complex; GO:0001725 stress fiber; GO:0002102 podosome; GO:0005622 intracellular; GO:0005623 cell; GO:0005634 nucleus; GO:0005654 nucleoplasm; GO:0005737 cytoplasm; GO:0005829 cytosol; GO:0005856 cytoskeleton; GO:0005886 plasma membrane; GO:0005912 adherens junction; GO:0005925 focal adhesion; GO:0005938 cell cortex; GO:0014069 postsynaptic density; GO:0015629 …	GO:0005198 structural molecule activity; GO:0005200 structural constituent of cytoskeleton; GO:0005488 binding; GO:0005515 protein binding; GO:0008092 cytoskeletal protein binding; GO:0008134 transcription factor binding; GO:0019894 kinesin binding; GO:0019899 enzyme binding; GO:0019900 kinase binding; GO:0019901 protein kinase binding; GO:0030957 Tat protein binding; GO:0042802 identical protein…			Z	KOG0676	Actin and related proteins
P83916	9	K	0.506	0.0408547	Down	Chromobox protein homolog 1 OS=Homo sapiens OX=9606 GN=CBX1 PE=1 SV=1	CBX1	1	7.78131e-21	182.52	2	K(1)VEEVLEEEEEEYVVEK	-1.583	1.41	1.218	1.318	0.389	0.809	0.8	nucleus	K11585			GO:0006355 regulation of transcription, DNA-templated; GO:0009889 regulation of biosynthetic process; GO:0009890 negative regulation of biosynthetic process; GO:0009892 negative regulation of metabolic process; GO:0010468 regulation of gene expression; GO:0010556 regulation of macromolecule biosynthetic process; GO:0010558 negative regulation of macromolecule biosynthetic process; GO:0010605 nega…	GO:0000228 nuclear chromosome; GO:0000775 chromosome, centromeric region; GO:0000785 chromatin; GO:0000790 nuclear chromatin; GO:0000792 heterochromatin; GO:0001939 female pronucleus; GO:0001940 male pronucleus; GO:0005622 intracellular; GO:0005623 cell; GO:0005634 nucleus; GO:0005654 nucleoplasm; GO:0005694 chromosome; GO:0005720 nuclear heterochromatin; GO:0005721 pericentric heterochromatin; G…	GO:0003682 chromatin binding; GO:0005488 binding; GO:0005515 protein binding; GO:0019899 enzyme binding; GO:0042802 identical protein binding; GO:0042803 protein homodimerization activity; GO:0046983 protein dimerization activity; GO:1990226 histone methyltransferase binding;	PF00385; PF01393	Chromo (CHRromatin Organisation MOdifier) domain; Chromo shadow domain	B	KOG1911	Heterochromatin-associated protein HP1 and related CHROMO domain proteins
P85037	347	K	1.541	0.0111546	Up	Forkhead box protein K1 OS=Homo sapiens OX=9606 GN=FOXK1 PE=1 SV=1	FOXK1	1	0.00123707	83.775	2	TADK(1)GWQNSIR	3.3675	0.803		0.733	1.192		1.175	nucleus	K09404			GO:0001558 regulation of cell growth; GO:0006355 regulation of transcription, DNA-templated; GO:0006357 regulation of transcription by RNA polymerase II; GO:0006464 cellular protein modification process; GO:0006508 proteolysis; GO:0006807 nitrogen compound metabolic process; GO:0008152 metabolic process; GO:0009653 anatomical structure morphogenesis; GO:0009889 regulation of biosynthetic process;…	GO:0005622 intracellular; GO:0005623 cell; GO:0005634 nucleus; GO:0005654 nucleoplasm; GO:0031974 membrane-enclosed lumen; GO:0031981 nuclear lumen; GO:0043226 organelle; GO:0043227 membrane-bounded organelle; GO:0043229 intracellular organelle; GO:0043231 intracellular membrane-bounded organelle; GO:0043233 organelle lumen; GO:0070013 intracellular organelle lumen;	GO:0000976 transcription regulatory region sequence-specific DNA binding; GO:0000977 RNA polymerase II transcription regulatory region sequence-specific DNA binding; GO:0000981 DNA-binding transcription factor activity, RNA polymerase II-specific; GO:0001067 regulatory region nucleic acid binding; GO:0003676 nucleic acid binding; GO:0003677 DNA binding; GO:0003690 double-stranded DNA binding; GO:…	PF00250	Fork head domain	K	KOG2294	Transcription factor of the Forkhead/HNF3 family
Q5VYK3	315	K	1.504	0.0277671	Up	Proteasome adapter and scaffold protein ECM29 OS=Homo sapiens OX=9606 GN=ECPAS PE=1 SV=2	ECPAS	1	1.77006e-05	154.94	2	TK(1)EGAVLKPELK	1.3727	0.784	0.829	0.768	1.472	1.105	1.005	nucleus	K11886			GO:0006508 proteolysis; GO:0006511 ubiquitin-dependent protein catabolic process; GO:0006807 nitrogen compound metabolic process; GO:0006950 response to stress; GO:0008152 metabolic process; GO:0009056 catabolic process; GO:0009057 macromolecule catabolic process; GO:0009987 cellular process; GO:0010033 response to organic substance; GO:0010243 response to organonitrogen compound; GO:0010498 prot…	GO:0005622 intracellular; GO:0005623 cell; GO:0005634 nucleus; GO:0005737 cytoplasm; GO:0005768 endosome; GO:0005769 early endosome; GO:0005770 late endosome; GO:0005771 multivesicular body; GO:0005783 endoplasmic reticulum; GO:0005798 Golgi-associated vesicle; GO:0005813 centrosome; GO:0005815 microtubule organizing center; GO:0005856 cytoskeleton; GO:0012505 endomembrane system; GO:0015630 micr…				S	KOG0915	Uncharacterized conserved protein
Q9H0H5	248	K	0.6	0.025558	Down	Rac GTPase-activating protein 1 OS=Homo sapiens OX=9606 GN=RACGAP1 PE=1 SV=1	RACGAP1	1	2.80254e-06	80.379	2	K(1)TGTLQPWNSDSTLNSR	2.5346		1.191	1.023		0.642	0.686	nucleus	K16733			GO:0000003 reproduction; GO:0000022 mitotic spindle elongation; GO:0000070 mitotic sister chromatid segregation; GO:0000226 microtubule cytoskeleton organization; GO:0000278 mitotic cell cycle; GO:0000280 nuclear division; GO:0000281 mitotic cytokinesis; GO:0000819 sister chromatid segregation; GO:0000910 cytokinesis; GO:0000912 assembly of actomyosin apparatus involved in cytokinesis; GO:0000915…	GO:0005622 intracellular; GO:0005623 cell; GO:0005634 nucleus; GO:0005654 nucleoplasm; GO:0005737 cytoplasm; GO:0005819 spindle; GO:0005829 cytosol; GO:0005856 cytoskeleton; GO:0005886 plasma membrane; GO:0009898 cytoplasmic side of plasma membrane; GO:0015630 microtubule cytoskeleton; GO:0016020 membrane; GO:0019897 extrinsic component of plasma membrane; GO:0019898 extrinsic component of membra…	GO:0005096 GTPase activator activity; GO:0005488 binding; GO:0005515 protein binding; GO:0005543 phospholipid binding; GO:0005547 phosphatidylinositol-3,4,5-trisphosphate binding; GO:0008017 microtubule binding; GO:0008047 enzyme activator activity; GO:0008092 cytoskeletal protein binding; GO:0008289 lipid binding; GO:0015631 tubulin binding; GO:0019899 enzyme binding; GO:0019900 kinase binding; …	PF00130; PF00620	Phorbol esters/diacylglycerol binding domain (C1 domain); RhoGAP domain	T	KOG3564	GTPase-activating protein
Q9H875	16	K	0.648	0.0478286	Down	PRKR-interacting protein 1 OS=Homo sapiens OX=9606 GN=PRKRIP1 PE=1 SV=1	PRKRIP1	1	0.00436751	72.365	2	K(1)EPQTLVIPK	0.29171	1.513	1.098	0.973	0.799	0.851	0.674	nucleus				GO:0001932 regulation of protein phosphorylation; GO:0001933 negative regulation of protein phosphorylation; GO:0003008 system process; GO:0003014 renal system process; GO:0006469 negative regulation of protein kinase activity; GO:0009892 negative regulation of metabolic process; GO:0010563 negative regulation of phosphorus metabolic process; GO:0010605 negative regulation of macromolecule metabo…	GO:0005622 intracellular; GO:0005623 cell; GO:0005634 nucleus; GO:0005730 nucleolus; GO:0031974 membrane-enclosed lumen; GO:0031981 nuclear lumen; GO:0043226 organelle; GO:0043227 membrane-bounded organelle; GO:0043228 non-membrane-bounded organelle; GO:0043229 intracellular organelle; GO:0043231 intracellular membrane-bounded organelle; GO:0043232 intracellular non-membrane-bounded organelle; GO…	GO:0003676 nucleic acid binding; GO:0003723 RNA binding; GO:0003725 double-stranded RNA binding; GO:0004857 enzyme inhibitor activity; GO:0004860 protein kinase inhibitor activity; GO:0005488 binding; GO:0005515 protein binding; GO:0019207 kinase regulator activity; GO:0019210 kinase inhibitor activity; GO:0019887 protein kinase regulator activity; GO:0019899 enzyme binding; GO:0019900 kinase bin…			S	KOG4055	Uncharacterized conserved protein
Q9UBN7	32	K	0.577	0.0420077	Down	Histone deacetylase 6 OS=Homo sapiens OX=9606 GN=HDAC6 PE=1 SV=2	HDAC6	1	3.64499e-12	148.69	2	QNPQSPPQDSSVTSK(1)R	-0.13799	1.38	1.039	1.49	0.543	0.91	0.803	nucleus	K11407	HDAC6; histone deacetylase 6 [EC:3.5.1.98]	hsa04613 Neutrophil extracellular trap formation; hsa05203 Viral carcinogenesis; hsa05034 Alcoholism; hsa05014 Amyotrophic lateral sclerosis	GO:0000209 protein polyubiquitination; GO:0000302 response to reactive oxygen species; GO:0000902 cell morphogenesis; GO:0000904 cell morphogenesis involved in differentiation; GO:0001932 regulation of protein phosphorylation; GO:0001934 positive regulation of protein phosphorylation; GO:0006325 chromatin organization; GO:0006355 regulation of transcription, DNA-templated; GO:0006464 cellular pro…	GO:0000118 histone deacetylase complex; GO:0005622 intracellular; GO:0005623 cell; GO:0005634 nucleus; GO:0005654 nucleoplasm; GO:0005737 cytoplasm; GO:0005768 endosome; GO:0005770 late endosome; GO:0005771 multivesicular body; GO:0005813 centrosome; GO:0005815 microtubule organizing center; GO:0005829 cytosol; GO:0005856 cytoskeleton; GO:0005874 microtubule; GO:0005875 microtubule associated com…	GO:0000976 transcription regulatory region sequence-specific DNA binding; GO:0000977 RNA polymerase II transcription regulatory region sequence-specific DNA binding; GO:0000978 RNA polymerase II cis-regulatory region sequence-specific DNA binding; GO:0000987 cis-regulatory region sequence-specific DNA binding; GO:0001067 regulatory region nucleic acid binding; GO:0003676 nucleic acid binding; GO:…	PF00850; PF02148	Histone deacetylase domain; Zn-finger in ubiquitin-hydrolases and other protein	B	KOG1343	Histone deacetylase complex, catalytic component HDA1
